# Supplementary material for: TBC-8, a Putative RAB-2 GAP, Regulates Dense Core Vesicle Maturation in Caenorhabditis elegans
Source: PLOS journal article supplement (doi:10.1371/journal.pgen.1002722), 2012-05-24
Supplement: S11 (10.1371/journal.pgen.1002722.s011) [file journal.pgen.1002722.s011]

**Supplementary Table S3.** Constructs used in this study:

*prab-3::tagRFPt-tbc-8*  
*punc-129::tagRFPt-tbc-8*  
*punc-129::tagRFPt-tbc-8(R697A)*  
*ptbc-8::gfp*  
*prab-3::yfp-tbc-8*  
*prab-3::mcherry-rab-2*  
*prab-3::tagRFPt-tbc-8*  
*prab-3::manns-yfp*  
*prab-3::mcherry-apt-9*  
*prab-3::mcherry-rab-5*  
*prab-3::mcherry-rab-5(Q78L)*  
*prab-3::mcherry-rab-7*  
*prab-3::ric-19-yfp*  
*punc-129::tagRFP*  
*GADT7\_tbc-8*  
*GADT7\_tbc-8(R697A)*  
*GADT7\_ica69*  
*GADT7\_ric-19*  
*GBKT7\_rab-1(Q70L)*  
*GBKT7\_rab-2(Q65L)*  
*GBKT7\_rab-3(Q81L)*  
*GBKT7\_rab-5(Q78L)*  
*GBKT7\_rab-6.1(Q70L)*  
*GBKT7\_rab-6.2(Q69L)*  
*GBKT7\_rab-7(Q68L)*  
*GBKT7\_rab-8(Q67L)*  
*GBKT7\_rab-10(Q68L)*  
*GBKT7\_rab-11.1(Q70L)*  
*GBKT7\_rab-14(Q70L)*  
*GBKT7\_rab-18(Q70L)*  
*GBKT7\_rab-19(Q69L)*  
*GBKT7\_rab-21(Q71L)*  
*GBKT7\_rab-28(Q95L)*  
*GBKT7\_rab-30(Q66L)*  
*GBKT7\_rab-33(Q159L)*  
*GBKT7\_rab-35(Q69L)*  
*GBKT7\_rab-37.1(Q37L)*  
*GBKT7\_rab-37.2(Q89L)*  
*GBKT7\_rab-39(Q77L)*  
*GBKT7\_rab-2(S20N)*  
*GBKT7\_rab-19(T24N)*  
*GBKT7\_rab-14(S25N)*  
*GBKT7\_rap-1*  
*GBKT7\_rap-2*  
*GBKT7\_rap-3*  
*GBKT7\_ras-1*  
*GBKT7\_ral-1*  
*GBKT7\_rap-1(G12V)*  
*GBKT7\_rap-2(G12V)*

GBKT7\_ *rap-3(G12V)*  
GBKT7\_ *ras-1(G26V)*  
GBKT7\_ *ral-1(G26V)*  
L4440  
L4440\_ *tbc-8*  
pcDNA6.2\_ *EmGFP\_Dest*  
pcDNA6.2\_ *EmGFP-ric-19*  
pcDNA3.1\_ *V5-tbc-8*  
pcDNA3.1\_ *V5-tbc-8(1-597 aa)*
